# Supplementary material
Source: ML conference proceedings conference paper supplement (https://openreview.net/forum?id=o0JSYq1TQ4)
Supplement: supplementary_material [file 2025_ThermalGen_final-20-21.pdf › ThermalGen-main-final/2025_ThermalGen_final-20-21.pdf]

## A Satellite-Aerial Dataset Collection Process

Our data collection process involves the following steps: (1) deploying UAVs over selected areas to capture thermal image patches embedded with GPS metadata; (2) generating a unified thermal orthomosaic<sup>1</sup>; (3) cropping and aligning corresponding regions from satellite imagery with a spatial resolution of 1m/pixel; (4) excluding regions with invalid thermal data; and (5) applying grid sampling to extract square image patches for model training and evaluation (following the setup in [54], we adopt a sampling stride of 35m and a crop size of  $512 \times 512$ ). This process ensures the precise alignment between satellite RGB and thermal images.

## B Dataset Preprocessing Details

For large-scale training, all datasets are converted into the WebDataset<sup>2</sup> format, except for the satellite-aerial datasets. These datasets consist of paired, spatially aligned thermal and satellite RGB maps, from which we randomly sample regions across the entire map. We also detail the specific preprocessing steps applied to each dataset to ensure reproducibility:

- **NII-CU**: Resized RGB images to match thermal image dimensions.
- **TARDAL**: Created an 80%/20% train/test split by random sampling since no official split was provided in the dataset.
- **Freiburg**: Removed the black padding from thermal images on both right and left sides.

## C Additional Training Details

We conduct all training and evaluation using a single NVIDIA A100 or H100 GPU. For training the thermal encoder and decoder, we employ a batch size of 16 and use the AdamW [32] optimizer with a learning rate of  $6 \times 10^{-5}$  and a weight decay of  $1 \times 10^{-3}$ , over a total of 200k training steps. All other configurations follow the default settings of the Latent Diffusion Model [37]. In training the flow-based generative models, we use a batch size of 64 with AdamW optimizer at a learning rate of  $1 \times 10^{-4}$  and no weight decay, for 200k training steps.

## D Dataset Parameters Comparison

A comparison between the Boson-night dataset [54] and our datasets is provided in Table 5, highlighting our contributions in terms of broader geographic coverage, increased diversity of thermal sensors, and the inclusion of both daytime and nighttime imagery.

Table 5: **Comparison of dataset parameters between Boson-night [54] and our datasets.** The differences are highlighted regarding area coverage, satellite map sources, thermal sensors used, collection years, and the number of surveyed regions.

| Dataset Name           | Area              | Satellite Map     | Thermal Sensor   | Collection Year | Number of Regions |
|------------------------|-------------------|-------------------|------------------|-----------------|-------------------|
| Boson-night [54]       | 33km <sup>2</sup> | Bing              | Boson            | 2021            | 1                 |
| DJI-day (Ours)         | 29km <sup>2</sup> | ESRI <sup>3</sup> | DJI Zenmuse H20T | 2023            | 1                 |
| BosonPlus-day (Ours)   | 85km <sup>2</sup> | ESRI <sup>3</sup> | BosonPlus        | 2024            | 3                 |
| BosonPlus-night (Ours) | 94km <sup>2</sup> | ESRI <sup>3</sup> | BosonPlus        | 2024            | 3                 |

## E Thermal Auto-encoder Training Details and Reconstruction Performance

This section details the training procedure and reconstruction performance of the thermal encoder  $E_T$  and decoder  $D_T$ . Both components are trained using the KL-VAE framework [37] on our curated RGB-T dataset collection, optimized with a combination of reconstruction losses (L1 and LPIPS [57])

<sup>1</sup>We used Agisoft Metashape to generate the orthomosaic: <https://www.agisoft.com/>

<sup>2</sup><https://github.com/webdataset/webdataset>

<sup>3</sup>ESRI satellite map: <https://www.esri.com/en-us/home>

| Table 6: <b>Reconstruction FID and PSNR performance across multiple RGB-T datasets</b> |       |       |       |       |        |                   |               |                 |             |
|----------------------------------------------------------------------------------------|-------|-------|-------|-------|--------|-------------------|---------------|-----------------|-------------|
| Method                                                                                 | FLIR  | LLVIP | AVIID | MSRS  | NII-CU | M <sup>3</sup> FD | BosonPlus-day | BosonPlus-night | Boson-night |
| <b>FID ↓</b>                                                                           |       |       |       |       |        |                   |               |                 |             |
| klvae w/o GAN loss                                                                     | 18.51 | 2.94  | 18.16 | 14.37 | 9.07   | 5.50              | 16.63         | 6.48            | 4.24        |
| klvae w/ GAN loss                                                                      | 14.66 | 3.14  | 12.21 | 12.20 | 8.67   | 5.33              | 6.73          | 3.52            | 2.00        |
| <b>PSNR ↑</b>                                                                          |       |       |       |       |        |                   |               |                 |             |
| klvae w/o GAN loss                                                                     | 30.10 | 37.63 | 31.29 | 38.73 | 45.73  | 40.12             | 30.46         | 41.32           | 43.53       |
| klvae w/ GAN loss                                                                      | 28.74 | 36.59 | 30.07 | 37.60 | 45.24  | 39.03             | 29.15         | 40.84           | 43.16       |

795 and KL regularization on the latent space. After 300 epochs (200k steps) of training, we optionally  
 796 fine-tune the final decoder layers for 75 epochs using a GAN loss plus the loss mentioned above,  
 797 as in the original LDM [37], to enhance FID scores without altering the latent representation, but it  
 798 will slightly negatively affect PSNR metrics. We note that the results reported in the paper use the  
 799 decoder **without** GAN loss.
